# Supplementary material for: Hierarchical Differentiation of Myeloid Progenitors Is Encoded in the Transcription Factor Network
Source: PubMed Central journal article supplement (PMC3154193; doi:10.1371/journal.pone.0022649), 2011-08-10
Supplement: pone.0022649.s001.pdf [file pone.0022649.s001.pdf]

# Supporting Information S1

## Detailed description of regulatory interactions

Reference: Krumsiek, Marr *et al.*, Hierarchical differentiation of myeloid progenitors is encoded in the transcription factor network, *PLoS ONE*.

Notation:  $\wedge$  = AND,  $\vee$  = OR,  $\overline{X}$  = not X

- $GATA-2 = GATA-2 \wedge (\overline{GATA-1 \wedge FOG-1}) \wedge \overline{PU.1}$

As described above, GATA-2 is an early hematopoietic transcription factor that directs differentiation into the MegE lineage by activating GATA-1. GATA-1 and FOG-1 in turn synergize to downregulate the activatory function of GATA-2 on its own promoter, pushing the differentiation process towards matured blood cells [1, 2]. As both factors are required to exhibit this repressory mechanism, we implemented their influence towards GATA-2 with a Boolean AND gate.

- $GATA-1 = (GATA-1 \vee GATA-2 \vee Fli-1) \wedge \overline{PU.1}$

GATA-2 is expressed in immature hematopoietic progenitor cells and activates GATA-1 to drive differentiation towards the MegE lineage [1]. GATA-1, in turn, activates its own expression by direct interaction of a GATA-1 homodimer protein complex with the GATA-1 proximal promoter [3, 4, 5]. Starck *et al.* [6] found that the GATA-1 downstream factor Fli-1 enhances the stimulatory activity of GATA-1 on GATA-1-responsive promoters. We assume this to have a positive effect on the autoregulation of GATA-1, making Fli-1 an indirect GATA-1 transcriptional activator. Finally, PU.1 and GATA-1 mutually inhibit each other's promoter activity in both mice [7, 8] and human [9] cells.

- $FOG-1 = GATA-1$

The transcription factor FOG-1 acts as a cofactor of GATA-1 and is necessary for megakaryocytic and erythroid differentiation [10, 11]. Iwasaki *et al.* [12] demonstrated that GATA-1 upregulates FOG-1 expression in lymphoid or granulocyte/megakaryocyte progenitor cells.

- $EKLF = GATA-1 \wedge \overline{Fli-1}$   
 $Fli-1 = GATA-1 \wedge \overline{EKLF}$

GATA-1 has been shown to be crucial for the expression of the erythrocyte lineage factor EKLF [13]. Moreover, there is evidence for the regulation of the megakaryocyte transcription factor Fli-1 by GATA-1 [14]. Studies of the dependence of GATA-1 on its cofactor showed that FOG-1 is dispensable for the induction of EKLF by GATA-1 [15, 16]. In addition, EKLF and Fli-1 repress each other's transcriptional activity on erythrocyte- and megakaryocyte-specific promoters, respectively [6]. This mutual inhibitory circuit creates the decision switch in the MegE lineage.

- $SCL = GATA-1 \wedge \overline{PU.1}$

SCL is a central hematopoietic player required for both primitive and definitive hematopoiesis [17, 18]. However, sustaining the expression of SCL requires different activators during the differentiation process. GATA-1 has been shown to specifically target the SCL promoter during erythroid differentiation [19]. PU.1 inhibits the expression of SCL [20] in the same context. Thus, the SCL player in our model solely represents the SCL protein which is active in the MegE lineage.

- $C/EBP\alpha = C/EBP\alpha \wedge (\overline{GATA-1 \wedge FOG-1 \wedge SCL})$

The major granulocyte/monocyte transcription factor C/EBP $\alpha$  has been shown to be a strong promoter of its own gene [21]. However, to the best of our knowledge, there is no experimental evidence for upstream regulatory factors of C/EBP $\alpha$  (literature research and personal communication). However, the factor is strongly downregulated during megakaryocyte/erythrocyte development [22] and thus requires one of the factors from the opposing lineage to be a direct or indirect inhibitor of C/EBP $\alpha$ . In our model the inhibition could be exhibited by, for instance, GATA-1, SCL or FOG-1. For the model derivation process, we require all three of these MegE factors to be active to constitute C/EBP $\alpha$  inhibition.

- $PU.1 = (C/EBP\alpha \vee PU.1) \wedge \overline{(GATA-1 \vee GATA-2)}$

$C/EBP\alpha$  is known to be a major inducer of  $PU.1$  during GM development and drives the CMP to GMP transition. It directly binds to a distal cis-regulatory element upstream of the  $PU.1$  promoter to stimulate  $PU.1$  mRNA transcription [23, 24].  $PU.1$  has been shown to autoregulate its expression in murine and human myeloid cells [25]. An autoregulatory loop mediated by an upstream regulatory element of the  $PU.1$  promoter has been postulated by Okuno et al. [25]. In addition, as described above,  $PU.1$  and the GATA factors mutually antagonize each other's promoter activity. The binding of GATA-1 and GATA-2 proteins to the  $PU.1$  promoter and subsequent repression have been shown by Chou et al. [7].

- $cJun = PU.1 \wedge \overline{Gfi-1}$

Steidl et al. [26] demonstrated the necessity of  $PU.1$  for the expression of  $cJun$  in preleukemic mouse hematopoietic stem cells. It is to be noted that no mechanistic explanation for this regulatory interaction is provided in the study. Dahl et al. [27] reported that the granulocytic transcription factor  $Gfi-1$  antagonizes the transcriptional activity of  $PU.1$ . This interaction does not reflect a change of the expression state of  $PU.1$  but rather an alteration of its effect as an activator of its target genes. Thus, we included  $Gfi-1$  in the equation of  $cJun$  as a repressor of the activation by  $PU.1$ . In human hematopoietic differentiation,  $cJun$  is known to positively autoregulate its own promoter [28]. However, since no comparable study has been published for murine hematopoiesis, we did not include such an autoregulatory loop of  $cJun$  in the model.

- $EgrNab = (PU.1 \wedge cJun) \wedge \overline{Gfi-1}$

We integrate the monocytic transcription factors  $Egr-1$ ,  $Egr-2$  and  $Nab-2$  into a combined pseudo-player  $EgrNab$  as proposed by Laslo et al. [29]. The transcriptional action of  $PU.1$  has been shown to rely on the cofactor  $cJun$ , both proteins constituting a heterodimeric protein complex  $PU.1:cJun$  [30]. Thus, we subsequently model their regulation with a logical AND. Laslo et al. [29] proposed a mutual antagonism between  $EgrNab$  and  $Gfi-1$  based on knockdown and overexpression experiments. Note that the antagonistic effect of  $Gfi-1$  on  $EgrNab$  is also explainable as an effect of the repressive influence of  $Gfi-1$  on  $PU.1$ -dependent transcription (cf.  $cJun$  above).

- $Gfi-1 = C/EBP\alpha \wedge \overline{EgrNab}$

Laslo et al. [29] proposed an activatory influence of  $C/EBP\alpha$  towards  $Gfi-1$  based on both phenomenological observations and subsequent modeling approaches. In addition, as mentioned before,  $EgrNab$  and  $Gfi-1$  constitute a mutual antagonistic regulatory circuit.

## References

- [1] Ohneda, K. and Yamamoto, M. Roles of hematopoietic transcription factors *gata-1* and *gata-2* in the development of red blood cell lineage. *Acta Haematol*, 108(4):237–245, 2002.
- [2] Grass, J.A., Boyer, M.E., Pal, S., Wu, J., Weiss, M.J., and Bresnick, E.H. *Gata-1*-dependent transcriptional repression of *gata-2* via disruption of positive autoregulation and domain-wide chromatin remodeling. *Proc Natl Acad Sci U S A*, 100(15):8811–8816, 2003.
- [3] Tsai, S.F., Strauss, E., and Orkin, S.H. Functional analysis and in vivo footprinting implicate the erythroid transcription factor *gata-1* as a positive regulator of its own promoter. *Genes Dev*, 5(6):919–931, 1991.
- [4] Orkin, S.H. *Gata*-binding transcription factors in hematopoietic cells. *Blood*, 80(3):575–581, 1992.
- [5] Trainor, C.D., Omichinski, J.G., Vandergon, T.L., Gronenborn, A.M., Clore, G.M., and Felsenfeld, G. A palindromic regulatory site within vertebrate *gata-1* promoters requires both zinc fingers of the *gata-1* dna-binding domain for high-affinity interaction. *Mol Cell Biol*, 16(5):2238–2247, 1996.
- [6] Starck, J., Cohet, N., Gonnet, C., Sarrazin, S., Doubeikovskaia, Z., Doubeikovski, A., Verger, A., Duterque-Coquillaud, M., and Morle, F. Functional cross-antagonism between transcription factors *fli-1* and *eklf*. *Mol Cell Biol*, 23(4):1390–1402, 2003.
- [7] Chou, S.T., Khandros, E., Bailey, L.C., Nichols, K.E., Vakoc, C.R., Yao, Y., Huang, Z., Crispino, J.D., Hardison, R.C., Blobel, G.A., and Weiss, M.J. Graded repression of *pu.1/sfp1* gene transcription by *gata* factors regulates hematopoietic cell fate. *Blood*, 114(5):983–994, 2009.
- [8] Rekhtman, N., Radparvar, F., Evans, T., and Skoultschi, A.I. Direct interaction of hematopoietic transcription factors *pu.1* and *gata-1*: functional antagonism in erythroid cells. *Genes Dev*, 13(11):1398–1411, 1999.
- [9] Zhang, P., Behre, G., Pan, J., Iwama, A., Wara-Aswapati, N., Radoska, H.S., Auron, P.E., Tenen, D.G., and Sun, Z. Negative cross-talk between hematopoietic regulators: *Gata* proteins repress *pu.1*. *Proc Natl Acad Sci U S A*, 96(15):8705–8710, 1999.
- [10] Tsang, A.P., Visvader, J.E., Turner, C.A., Fujiwara, Y., Yu, C., Weiss, M.J., Crossley, M., and Orkin, S.H. *Fog*, a multitype zinc finger protein, acts as a cofactor for transcription factor *gata-1* in erythroid and megakaryocytic differentiation. *Cell*, 90(1):109–119, 1997.
- [11] Tsang, A.P., Fujiwara, Y., Hom, D.B., and Orkin, S.H. Failure of megakaryopoiesis and arrested erythropoiesis in mice lacking the *gata-1* transcriptional cofactor *fog*. *Genes Dev*, 12(8):1176–1188, 1998.
- [12] Iwasaki, H., Mizuno, S., Wells, R.A., Cantor, A.B., Watanabe, S., and Akashi, K. *Gata-1* converts lymphoid and myelomonocytic progenitors into the megakaryocyte/erythrocyte lineages. *Immunity*, 19(3):451–462, 2003.
- [13] Crossley, M., Tsang, A.P., Bieker, J.J., and Orkin, S.H. Regulation of the erythroid *kruppel-like factor (eklf)* gene promoter by the erythroid transcription factor *gata-1*. *J Biol Chem*, 269(22):15440–15444, 1994.
- [14] Barbeau, B., Barat, C., Bergeron, D., and Rassart, E. The *gata-1* and *spi-1* transcriptional factors bind to a *gata/ets* dual element in the *fli-1* exon 1. *Oncogene*, 18(40):5535–5545, 1999.
- [15] Crispino, J.D., Lodish, M.B., MacKay, J.P., and Orkin, S.H. Use of altered specificity mutants to probe a specific protein-protein interaction in differentiation: the *gata-1:fog* complex. *Mol Cell*, 3(2):219–228, 1999.
- [16] Letting, D.L., Chen, Y.Y., Rakowski, C., Reedy, S., and Blobel, G.A. Context-dependent regulation of *gata-1* by friend of *gata-1*. *Proc Natl Acad Sci U S A*, 101(2):476–481, 2004.

- [17] Orkin, S.H. and Zon, L.I. Hematopoiesis: an evolving paradigm for stem cell biology. *Cell*, 132(4):631–644, 2008.
- [18] Pimanda, J.E., Ottersbach, K., Knezevic, K., Kinston, S., Chan, W.Y.I., Wilson, N.K., Landry, J.R., Wood, A.D., Kolb-Kokocinski, A., Green, A.R., Tannahill, D., Lacaud, G., Kouskoff, V., and Göttgens, B. Gata2, flil, and scl form a recursively wired gene-regulatory circuit during early hematopoietic development. *Proc Natl Acad Sci U S A*, 104(45):17692–17697, 2007.
- [19] Bockamp, E.O., McLaughlin, F., Murrell, A.M., Göttgens, B., Robb, L., Begley, C.G., and Green, A.R. Lineage-restricted regulation of the murine scl/tal-1 promoter. *Blood*, 86(4):1502–1514, 1995.
- [20] Clech, M.L., Chalhouh, E., Dohet, C., Roure, V., Fichelson, S., Moreau-Gachelin, F., and Mathieu, D. Pu.1/spi-1 binds to the human tal-1 silencer to mediate its activity. *J Mol Biol*, 355(1):9–19, 2006.
- [21] Legraverend, C., Antonson, P., Flodby, P., and Xanthopoulos, K.G. High level activity of the mouse ccaat/enhancer binding protein (c/ebp alpha) gene promoter involves autoregulation and several ubiquitous transcription factors. *Nucleic Acids Res*, 21(8):1735–1742, 1993.
- [22] Laiosa, C.V., Stadtfeld, M., and Graf, T. Determinants of lymphoid-myeloid lineage diversification. *Annu Rev Immunol*, 24:705–738, 2006.
- [23] Friedman, A.D. C/ebpalpha induces pu.1 and interacts with ap-1 and nf-kappab to regulate myeloid development. *Blood Cells Mol Dis*, 39(3):340–343, 2007.
- [24] Yeaman, C., Wang, D., Paz-Priel, I., Torbett, B.E., Tenen, D.G., and Friedman, A.D. C/ebpalpha binds and activates the pu.1 distal enhancer to induce monocyte lineage commitment. *Blood*, 110(9):3136–3142, 2007.
- [25] Okuno, Y., Huang, G., Rosenbauer, F., Evans, E.K., Radomska, H.S., Iwasaki, H., Akashi, K., Moreau-Gachelin, F., Li, Y., Zhang, P., Göttgens, B., and Tenen, D.G. Potential autoregulation of transcription factor pu.1 by an upstream regulatory element. *Mol Cell Biol*, 25(7):2832–2845, 2005.
- [26] Steidl, U., Rosenbauer, F., Verhaak, R.G.W., Gu, X., Ebraldidze, A., Otu, H.H., Klippel, S., Steidl, C., Bruns, I., Costa, D.B., Wagner, K., Aivado, M., Kobbe, G., Valk, P.J.M., Passequé, E., Libermann, T.A., Delwel, R., and Tenen, D.G. Essential role of jun family transcription factors in pu.1 knockdown-induced leukemic stem cells. *Nat Genet*, 38(11):1269–1277, 2006.
- [27] Dahl, R., Iyer, S.R., Owens, K.S., Cuylear, D.D., and Simon, M.C. The transcriptional repressor gfi-1 antagonizes pu.1 activity through protein-protein interaction. *J Biol Chem*, 282(9):6473–6483, 2007.
- [28] Angel, P., Hattori, K., Smeal, T., and Karin, M. The jun proto-oncogene is positively autoregulated by its product, jun/ap-1. *Cell*, 55(5):875–885, 1988.
- [29] Laslo, P., Spooner, C.J., Warmflash, A., Lancki, D.W., Lee, H.J., Sciammas, R., Gantner, B.N., Dinner, A.R., and Singh, H. Multilineage transcriptional priming and determination of alternate hematopoietic cell fates. *Cell*, 126(4):755–766, 2006.
- [30] Behre, G., Whitmarsh, A.J., Coghlan, M.P., Hoang, T., Carpenter, C.L., Zhang, D.E., Davis, R.J., and Tenen, D.G. c-jun is a jnk-independent coactivator of the pu.1 transcription factor. *J Biol Chem*, 274(8):4939–4946, 1999.
