# Supplementary material for: Hierarchical Differentiation of Myeloid Progenitors Is Encoded in the Transcription Factor Network
Source: PubMed Central journal article supplement (PMC3154193; doi:10.1371/journal.pone.0022649), 2011-08-10
Supplement: pone.0022649.s002.pdf [file pone.0022649.s002.pdf]

# Supporting Information S2

## Downregulation of GATA-2 during erythrocyte differentiation

Reference: Krumsiek, Marr *et al.*, Hierarchical differentiation of myeloid progenitors is encoded in the transcription factor network, *PLoS ONE*.

Our model predicts GATA-2 to be downregulated during erythrocyte and megakaryocyte differentiation. However, in the microarray data for the progenitor cells of both lineages (Pronk *et al.* [1]), we observe GATA-2 only partially downregulated. By the inspection of mature erythrocytic cells (Chambers *et al.* [2]), we get further evidence for a stepwise inhibition of GATA-2.

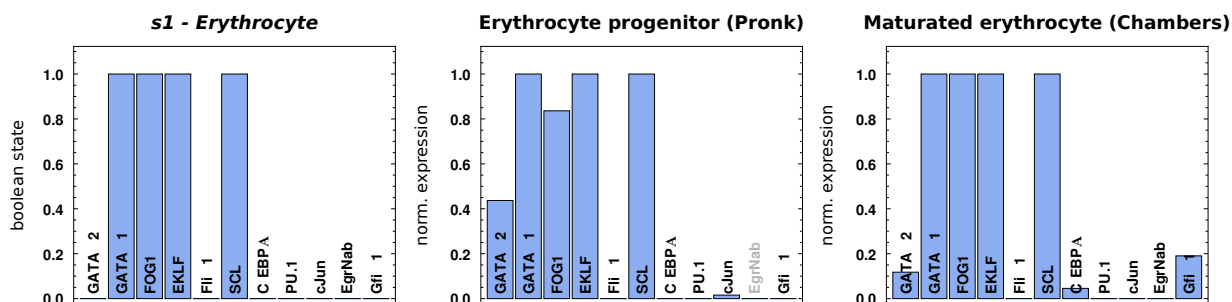

## References

- [1] Pronk, C.J.H., Rossi, D.J., Månsson, R., Attema, J.L., Norddahl, G.L., Chan, C.K.F., Sigvardsson, M., Weissman, I.L., and Bryder, D. Elucidation of the phenotypic, functional, and molecular topography of a myeloerythroid progenitor cell hierarchy. *Cell Stem Cell*, 1(4):428–442, 2007.
- [2] Chambers, S.M., Boles, N.C., Lin, K.Y.K., Tierney, M.P., Bowman, T.V., Bradfute, S.B., Chen, A.J., Merchant, A.A., Sirin, O., Weksberg, D.C., Merchant, M.G., Fisk, C.J., Shaw, C.A., and Goodell, M.A. Hematopoietic fingerprints: an expression database of stem cells and their progeny. *Cell Stem Cell*, 1(5):578–591, 2007.
