# Supplementary material for: Hierarchical Differentiation of Myeloid Progenitors Is Encoded in the Transcription Factor Network
Source: PubMed Central journal article supplement (PMC3154193; doi:10.1371/journal.pone.0022649), 2011-08-10
Supplement: pone.0022649.s005.pdf [file pone.0022649.s005.pdf]

## Supporting Information S5

### mRNA probes

Reference: Krumsiek, Marr *et al.*, Hierarchical differentiation of myeloid progenitors is encoded in the transcription factor network, *PLoS ONE*.

The following table provides a list of mRNA probe IDs on the Affymetrix GeneChip Mouse Genome 430 2.0 according to the MGI database for all gene products used in our study.

| <b>Gene</b>    | <b>Probe ID(s)</b>         |
|----------------|----------------------------|
| C/EBP $\alpha$ | 4118982_at                 |
| Sfp1 (PU.1)    | 1418747_at                 |
| Jun            | 1417409_at, 1448694_at     |
| Gfi1           | 1417679_at                 |
| Egr1           | 1417065_at                 |
| Egr2           | 1427683_at, 1427682_a_at   |
| Nab2           | 1417930_at                 |
| Gata2          | 1450333_a_at, 1428816_a_at |
| Gata1          | 1449232_at                 |
| Fog1           | 1451046_at                 |
| EKLF           | 1418600_at                 |
| Fli1           | 1422024_at                 |
| Tal1 (SCL)     | 1449389_at                 |
